# Supplementary material for: Facile synthesis of hydroxymethylcytosine-containing oligonucleotides and their reactivity upon osmium oxidation
Source: Royal Society of Chemistry journal article supplement (doi:10.1039/c1ob05247k), 2011-01-01
Supplement: c1ob05247k.pdf [file c1ob05247k.pdf]

## Supplementary Information

### Facile synthesis of hydroxymethylcytosine-containing oligonucleotides and their reactivity upon osmium oxidation

Kaori Sugizaki,<sup>1</sup> Shuji Ikeda,<sup>1</sup> Hiroyuki Yanagisawa,<sup>1</sup> Akimitsu Okamoto<sup>1,2,\*</sup>

<sup>1</sup>Advanced Science Institute, RIKEN, Wako, Saitama 351-0198, Japan, <sup>2</sup>PRESTO, Japan Science and Technology Agency, 4-1-8 Honcho, Kawaguchi, Saitama 332-0012, Japan

\*Phone, +81-48-467-9238; Fax, +81-48-467-9205; e-mail, aki-okamoto@riken.jp

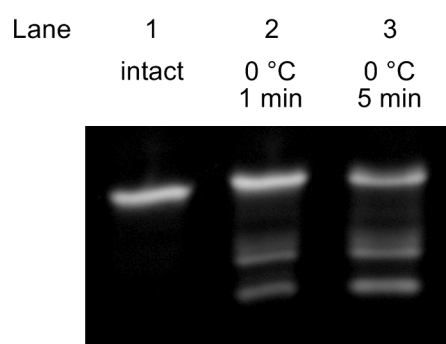

**Fig. S1** Osmium oxidation of **ODN3<sup>hmC</sup>**, 5'-Fluo-AAA<sup>hm</sup>CGAG<sup>hm</sup>CGAAAAA-3'. The fluorescein-labeled **ODN3<sup>hmC</sup>** (5  $\mu$ M) to be examined was incubated in a solution of 5 mM potassium osmate, 100 mM potassium hexacyanoferrate(III), 100 mM bipyridine, 0.5 mM EDTA, and 1 M sodium chloride in 50 mM Tris-HCl buffer (pH 7.7) and 10% acetonitrile at 0 °C for 1 min (Lane 2) or 5 min (Lane 3). The reaction sample was heated in 50  $\mu$ L of 10% piperidine at 90 °C for 20 min to cleave the strand at oxidation site. Lane 1, intact **ODN3<sup>hmC</sup>**.

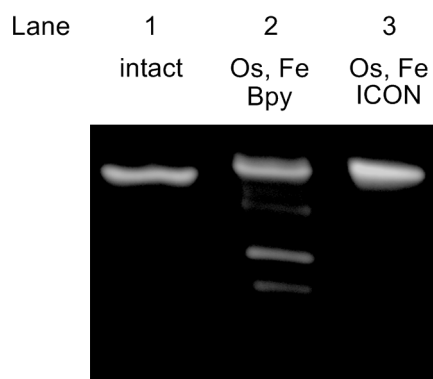

**Fig. S2** Effect of hybridization with the ICON probe on osmium oxidation. The fluorescein-labeled **ODN4**<sup>(<sup>h</sup>mC)</sup> 5'-Fluo-AGCAA<sup>h</sup>mCGAAGCAAAA-3' (5  $\mu$ M) to be examined was incubated in a solution of 5 mM potassium osmate, 100 mM potassium hexacyanoferrate(III), 100 mM bipyridine, 0.5 mM EDTA, and 1 M sodium chloride in 50 mM Tris-HCl buffer (pH 7.7) and 10% acetonitrile at 0 °C for 5 min (Lane 2) or in a solution of 5  $\mu$ M **ODN2'**(**ICON**), 5 mM potassium osmate, 100 mM potassium hexacyanoferrate(III), 0.5 mM EDTA, and 1 M sodium chloride in 50 mM Tris-HCl buffer (pH 7.7) at 25 °C for 10 min (Lane 3). The reaction sample was heated in 50  $\mu$ L of 10% piperidine at 90 °C for 20 min to cleave the strand at oxidation site. Lane 1, intact **ODN3**<sup>(<sup>h</sup>mC)</sup>.

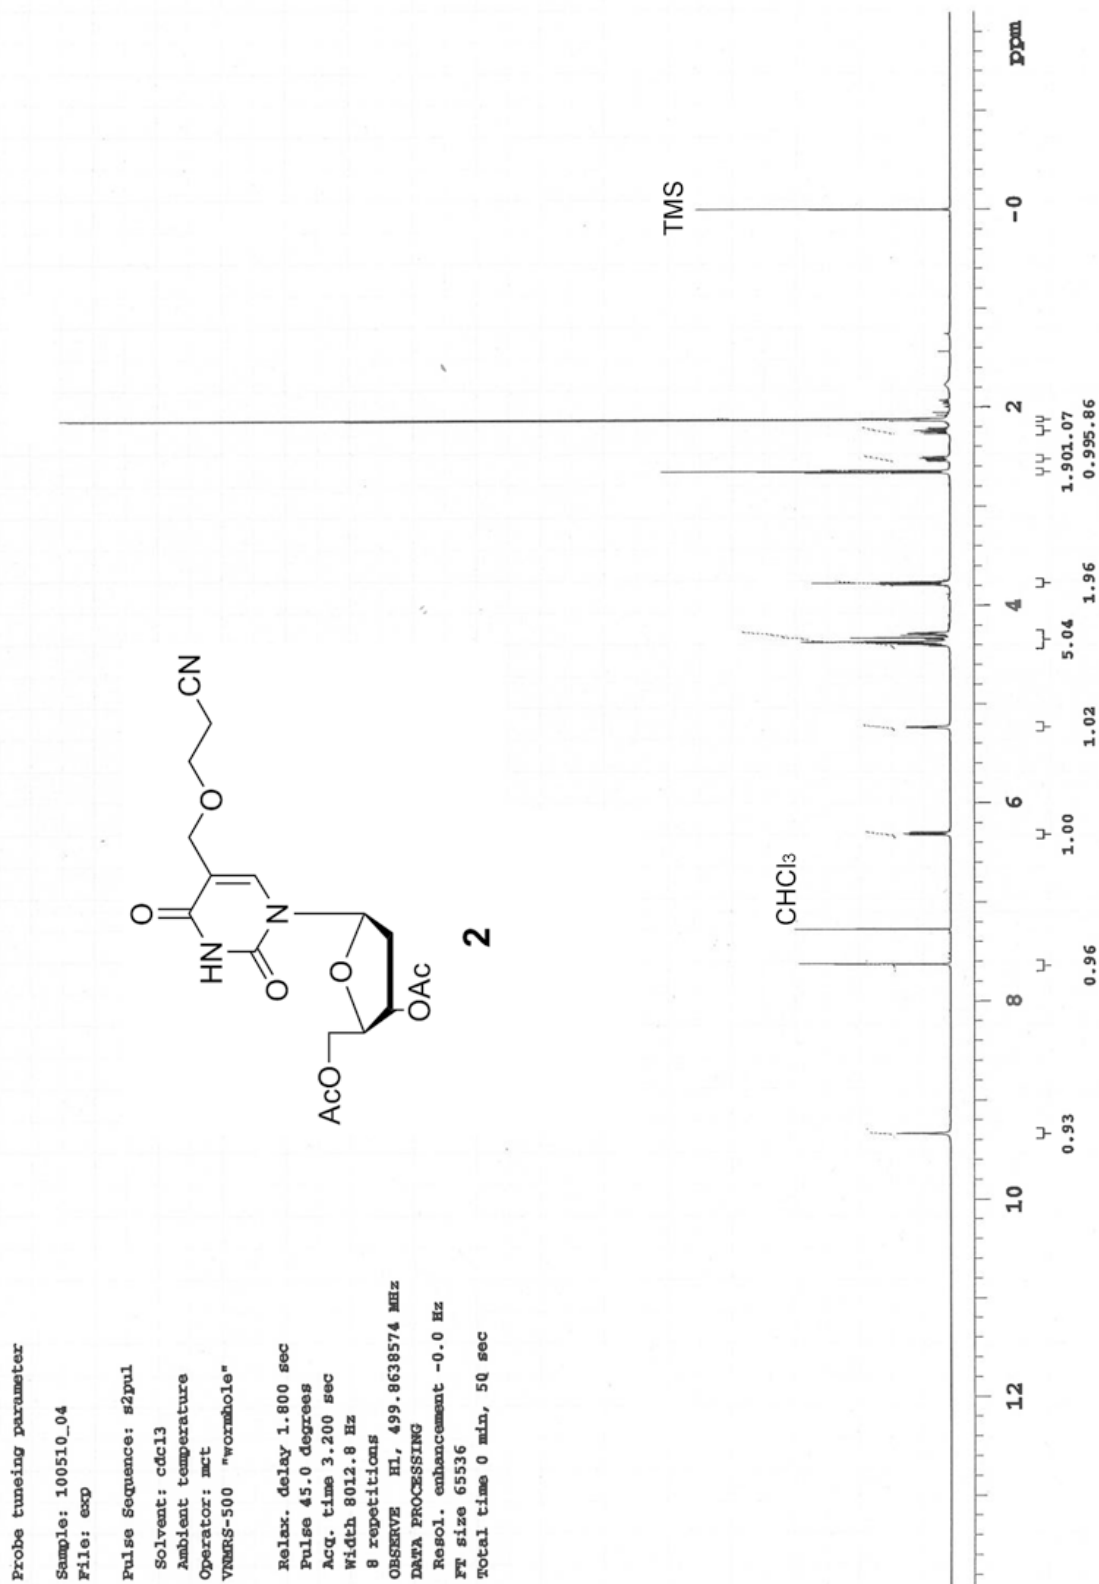

Fig. S3  $^1\text{H}$  NMR of nucleoside 2.

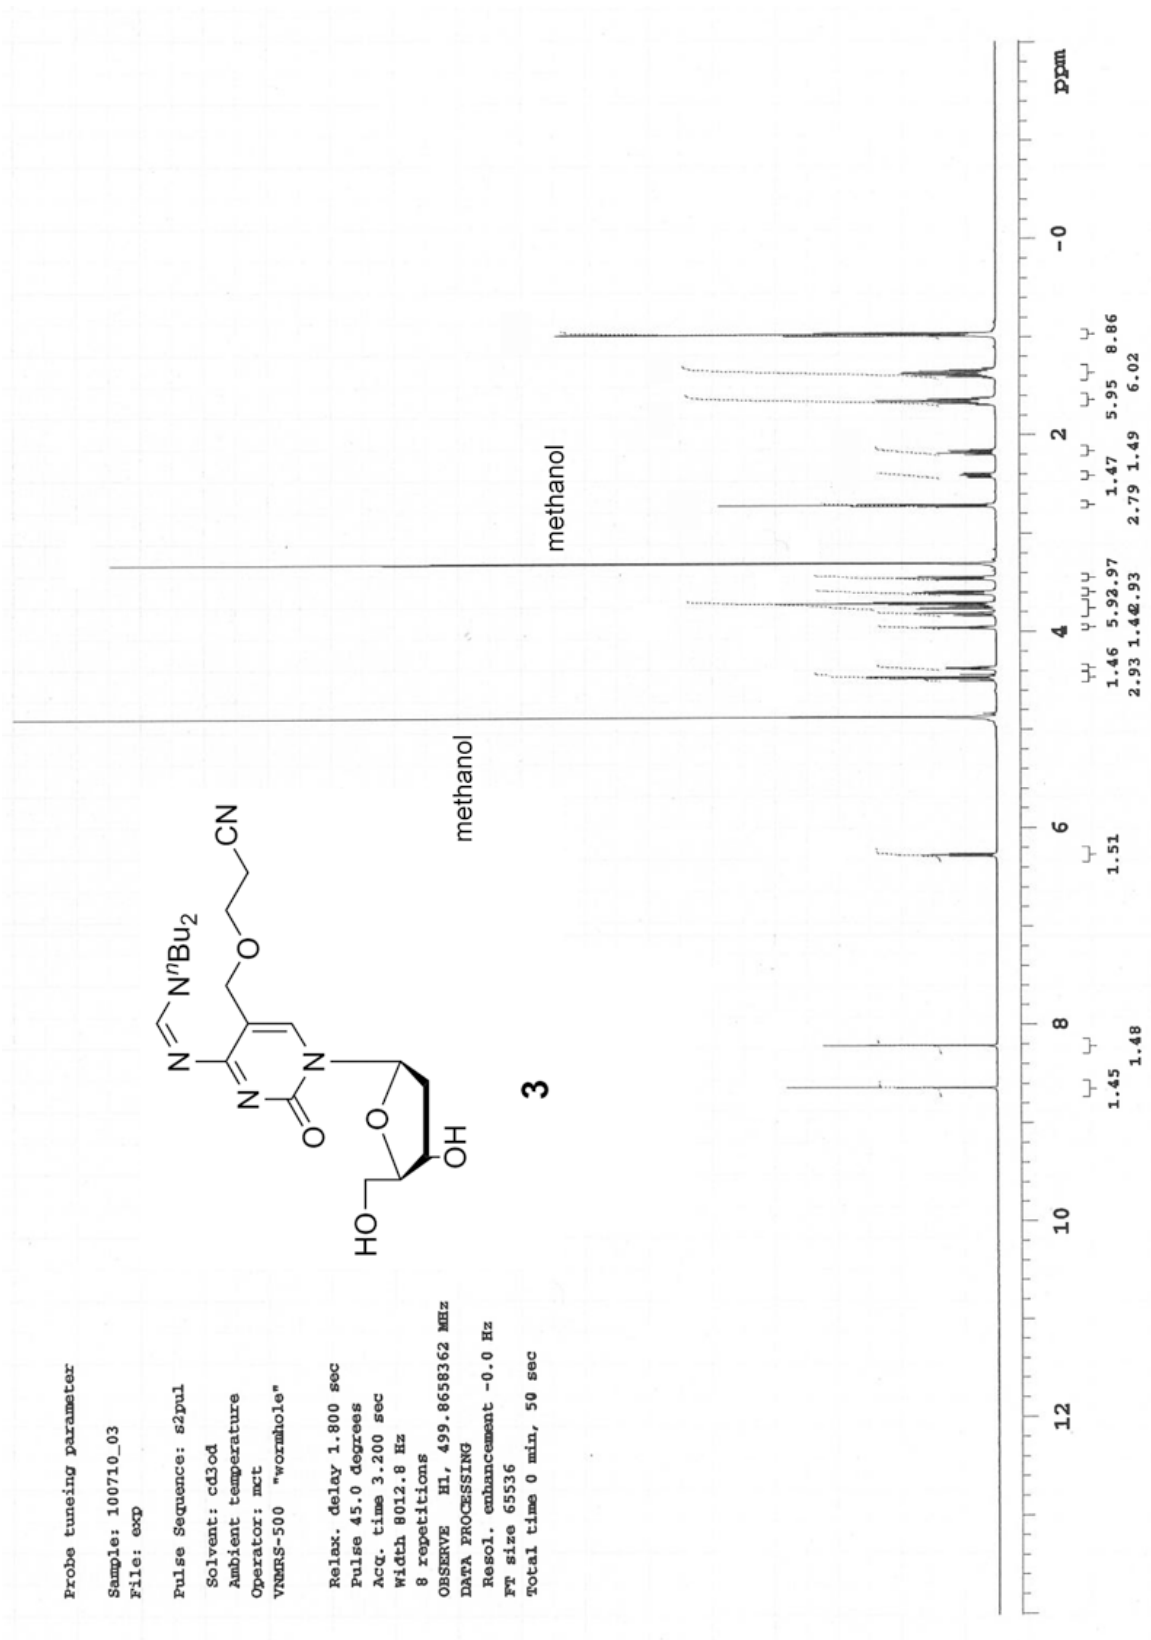

Fig. S4 <sup>1</sup>H NMR of nucleoside 3.

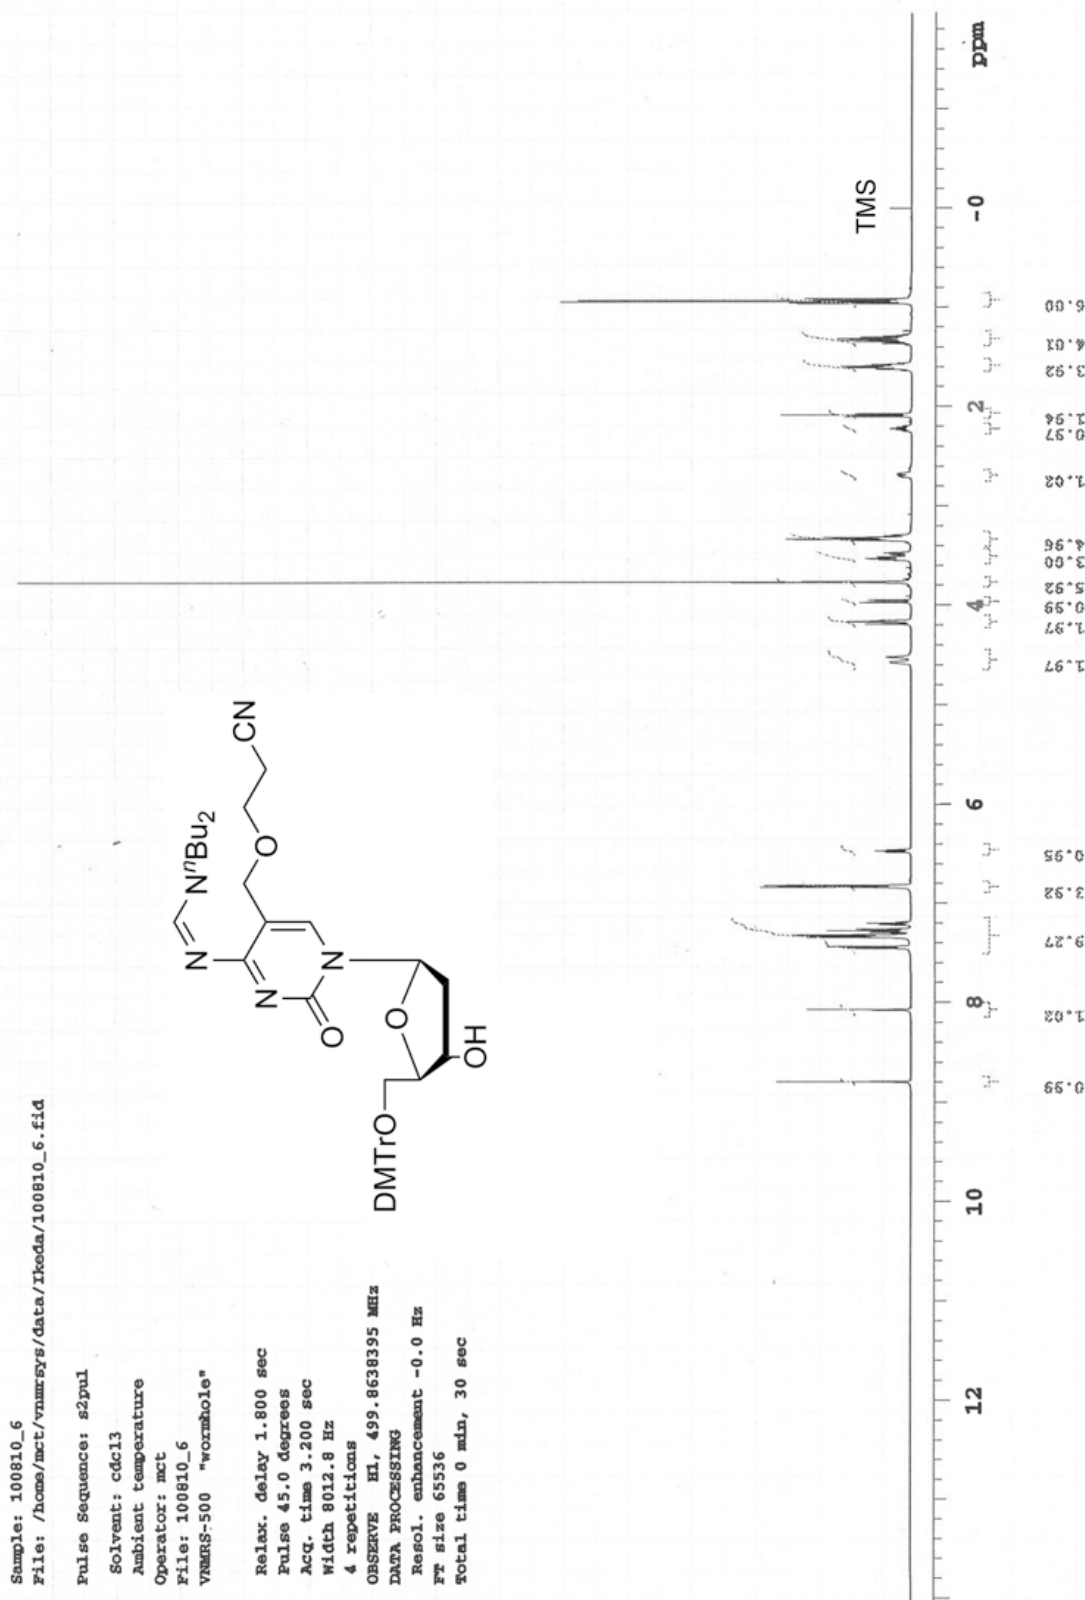

Fig. S5  $^1\text{H}$  NMR of a dimethoxytritylated nucleoside (the precursor of **4**).
